# Supplementary material for: Mosquitoes on a chip—environmental DNA-based detection of invasive mosquito species using high-throughput real-time PCR
Source: PeerJ. 2024 Sep 30;12:e17782. doi: 10.7717/peerj.17782 (PMC11448751; doi:10.7717/peerj.17782)
Supplement: Supplemental Information 1 [file peerj-12-17782-s001.xlsx]

## Sheet: Synthesis qPCR
Species	Site No.	qPCR replicate 1	qPCR replicate 2	qPCR replicate 3	Ct mean	Std.Dev	% CV		Species	Site No.	qPCR screening (just one replicate)		Species	Site No.	qPCR screening (just one replicate)
Ae. albopictus	1	Undetermined	Undetermined	Undetermined					Ae. japonicus	1	detailed results see below		Ae. koreicus	1	detailed results see below			not applicable
Ae. albopictus	2	Undetermined	Undetermined	Undetermined					Ae. japonicus	2			Ae. koreicus	2
Ae. albopictus	3	Undetermined	Undetermined	Undetermined					Ae. japonicus	3			Ae. koreicus	3
Ae. albopictus	4	Undetermined	Undetermined	Undetermined					Ae. japonicus	4			Ae. koreicus	4
Ae. albopictus	5	35.6106	40.5005	30.776	38.0556	4.86227	12.7768		Ae. japonicus	5	Undetermined		Ae. koreicus	5	Undetermined
Ae. albopictus	6	33.9981	32.7495	35.068	33.3738	1.16041	3.47702		Ae. japonicus	6	Undetermined		Ae. koreicus	6	Undetermined
Ae. albopictus	7	34.1385	34.7361	35.2622	34.4373	0.562236	1.63264		Ae. japonicus	7	Undetermined		Ae. koreicus	7	Undetermined
Ae. albopictus	8	31.3847	30.0531	30.3108	30.7189	0.706281	2.29917		Ae. japonicus	8	Undetermined		Ae. koreicus	8	Undetermined
Ae. albopictus	9	29.2168	28.8559	28.8616	29.0363	0.20671	0.711901		Ae. japonicus	9	Undetermined		Ae. koreicus	9	Undetermined
Ae. albopictus	10	37.4368	37.4263	36.4531	37.4316	0.564938	1.50926		Ae. japonicus	10	Undetermined		Ae. koreicus	10	Undetermined
Ae. albopictus	11	28.0026	29.1801	27.9309	28.5913	0.701419	2.45326		Ae. japonicus	11	Undetermined		Ae. koreicus	11	Undetermined
Ae. albopictus	12	37.2293	37.1387	41.305	37.184	2.37968	6.39973		Ae. japonicus	12	Undetermined		Ae. koreicus	12	Undetermined
Ae. albopictus	13	27.2598	27.2531	27.0113	27.2565	0.141591	0.519477		Ae. japonicus	13	Undetermined		Ae. koreicus	13	Undetermined
Ae. albopictus	14	27.8675	28.5842	28.0583	28.2259	0.371164	1.31498		Ae. japonicus	14	Undetermined		Ae. koreicus	14	Undetermined
Ae. albopictus	tissue 10 ng/µl	13.4521							Ae. japonicus	tissue 10 ng/µl	26.69		Ae. koreicus	tissue 10 ng/µl	15.65
Ae. albopictus	NTC	Undetermined				intra-assay % CV:	3.30942		Ae. japonicus	NTC	Undetermined		Ae. koreicus	NTC	Undetermined
Ae. albopictus	Field blank Sterivex	Undetermined
Ae. albopictus	Extraction control Sterivex	Undetermined
Species	Site No.	Filter type
		PES						Sterivex						Nylon						PES			Sterivex			Nylon
		Biological replicate A			Biological replicate B			Biological replicate A			Biological replicate B			Biological replicate A			Biological replicate B
		qPCR replicate 1	qPCR replicate 2	qPCR replicate 3	qPCR replicate 1	qPCR replicate 2	qPCR replicate 3	qPCR replicate 1	qPCR replicate 2	qPCR replicate 3	qPCR replicate 1	qPCR replicate 2	qPCR replicate 3	qPCR replicate 1	qPCR replicate 2	qPCR replicate 3	qPCR replicate 1	qPCR replicate 2	qPCR replicate 3	Ct mean	Std.Dev	% CV	Ct mean	Std.Dev	% CV	Ct mean	Std.Dev	% CV
Ae. japonicus	1	Undetermined	Undetermined	Undetermined	Undetermined	Undetermined	Undetermined	Undetermined	Undetermined	Undetermined	Undetermined	Undetermined	Undetermined	Undetermined	Undetermined	Undetermined	Undetermined	Undetermined	Undetermined
Ae. japonicus	2	41.2379	39.3608	Undetermined	40.4095	39.1339	38.6984	37.3119	36.3653	36.7434	39.3208	39.5577	36.0149	40.1621	37.5157	Undetermined	36.3846	35.6823	37.162	39.7681	1.03492	2.60238	37.5523	1.52536	4.06195	37.3813	1.70875	4.57112
Ae. japonicus	3	Undetermined	Undetermined	Undetermined	Undetermined	Undetermined	Undetermined	Undetermined	Undetermined	Undetermined	Undetermined	Undetermined	Undetermined	Undetermined	Undetermined	Undetermined	Undetermined	Undetermined	Undetermined
Ae. japonicus	4	Undetermined	Undetermined	Undetermined	Undetermined	Undetermined	Undetermined	Undetermined	Undetermined	Undetermined	Undetermined	Undetermined	Undetermined	Undetermined	Undetermined	Undetermined	Undetermined	Undetermined	Undetermined
Ae. japonicus	5
Ae. japonicus	6
Ae. japonicus	7
Ae. japonicus	8
Ae. japonicus	9
Ae. japonicus	10
Ae. japonicus	11
Ae. japonicus	12
Ae. japonicus	13
Ae. japonicus	14
intra-assay % CV:		Ct mean	Std.Dev	% CV	Ct mean	Std.Dev	% CV	Ct mean	Std.Dev	% CV	Ct mean	Std.Dev	% CV	Ct mean	Std.Dev	% CV	Ct mean	Std.Dev	% CV
		40.2994	1.3273	3.2936	39.4139	0.889295	2.2563	36.8068	0.476476	1.29453	38.2978	1.98055	5.17144	38.8389	1.8713	4.8181	36.4096	0.740163	2.03288
Ae. japonicus	tissue 10 ng/µl	21.5275
Ae. japonicus	NTC	Undetermined
Ae. japonicus	Field blank Sterivex	Undetermined
Ae. japonicus	Extraction control Sterivex	Undetermined
Ae. japonicus	Field blank Nylon	Undetermined
Ae. japonicus	Extraction control Nylon	Undetermined
Ae. japonicus	Field blank PES	Undetermined
Ae. japonicus	Extraction control PES	Undetermined
Species	Site No.	Filter type
		PES						Sterivex						Nylon						PES			Sterivex			Nylon
		Biological replicate A			Biological replicate B			Biological replicate A			Biological replicate B			Biological replicate A			Biological replicate B
		qPCR replicate 1	qPCR replicate 2	qPCR replicate 3	qPCR replicate 1	qPCR replicate 2	qPCR replicate 3	qPCR replicate 1	qPCR replicate 2	qPCR replicate 3	qPCR replicate 1	qPCR replicate 2	qPCR replicate 3	qPCR replicate 1	qPCR replicate 2	qPCR replicate 3	qPCR replicate 1	qPCR replicate 2	qPCR replicate 3	Ct mean	Std.Dev	% CV	Ct mean	Std.Dev	% CV	Ct mean	Std.Dev	% CV
Ae. koreicus	1	41.3103	37.4265	37.7401	35.742	33.9065	34.6619	38.8393	39.6507	34.6343	34.787	37.4562	36.4818	37.5622	Undetermined	Undetermined	37.6631	Undetermined	Undetermined	36.7979	2.6714	7.25967	36.9749	2.06764	5.59201	37.6127	0.07134	0.18967
Ae. koreicus	2	37.9293	39.8421	Undetermined	Undetermined	39.1972	37.869	38.9612	38.2776	Undetermined	40.6401	40.61	Undetermined	37.5236	Undetermined	36.7919	36.8636	37.6557	36.843	38.7094	0.972275	2.51173	39.6222	1.19121	3.00641	37.1356	0.417982	1.12556
Ae. koreicus	3	Undetermined	Undetermined	Undetermined	Undetermined	Undetermined	Undetermined	Undetermined	Undetermined	Undetermined	Undetermined	Undetermined	Undetermined	Undetermined	Undetermined	Undetermined	Undetermined	Undetermined	Undetermined
Ae. koreicus	4	Undetermined	Undetermined	Undetermined	Undetermined	Undetermined	Undetermined	Undetermined	Undetermined	Undetermined	Undetermined	Undetermined	Undetermined	Undetermined	Undetermined	Undetermined	Undetermined	Undetermined	Undetermined
Ae. koreicus	5
Ae. koreicus	6
Ae. koreicus	7
Ae. koreicus	8
Ae. koreicus	9
Ae. koreicus	10
Ae. koreicus	11
Ae. koreicus	12
Ae. koreicus	13
Ae. koreicus	14
intra-assay % CV:		Ct mean	Std.Dev	% CV	Ct mean	Std.Dev	% CV	Ct mean	Std.Dev	% CV	Ct mean	Std.Dev	% CV	Ct mean	Std.Dev	% CV	Ct mean	Std.Dev	% CV
		38.8256	2.15746	5.5568	34.7701	0.922537	2.65325	37.7081	2.69271	7.14092	36.2417	1.35069	3.72689	37.6127	0.07134	0.18967
		38.8857	1.35261	3.47842	38.5331	0.939198	2.43738	38.6194	0.483421	1.25176	40.6251	0.0212552	0.0523205	37.1577	0.51742	1.3925	37.1208	0.463396	1.24835
Ae. koreicus	tissue 10 ng/µl	16.4862
Ae. koreicus	NTC	Undetermined
Ae. koreicus	Field blank Sterivex	Undetermined
Ae. koreicus	Extraction control Sterivex	Undetermined
Ae. koreicus	Field blank Nylon	Undetermined
Ae. koreicus	Extraction control Nylon	Undetermined
Ae. koreicus	Field blank PES	Undetermined
Ae. koreicus	Extraction control PES	Undetermined

## Sheet: Synthesis eDNA Chips
eDNA Chip No. 1							eDNA Chip No. 2							eDNA Chip No. 3
Ae. albopictus							Ae. albopictus							Ae. albopictus
Sample	ØCt	SD	ØCt	SD	Success rate		Sample	ØCt	SD	ØCt	SD	Success rate		Sample	ØCt	SD	ØCt	SD	Success rate
	Value	Value	Quality	Quality	positive			Value	Value	Quality	Quality	positive			Value	Value	Quality	Quality	positive
Aealbo_0.01g	/	/	/	/			Aealbo_0.01g	2.54602	0.14539	0.165885	0.0456594			Field blank Sterivex	/	/	/	/
E220001_Aealbo_a	4.42149	0.109748	0.800653	0.0465079	24		E220001_Aealbo_a	3.25259	0.127362	0.406012	0.0456044	32		Field blank Sterivex	/	/	/	/
E220001_Aealbo_b	4.55863	0.0924823	0.852757	0.0310576	24		E220001_Aealbo_b	3.59357	0.104667	0.531191	0.0348889	32		Extraction control Sterivex	/	/	/	/
E220002_Aealbo_a	7.85689	0.122765	0.990458	0.016774	24		E220002_Aealbo_a	8.11988	0.0885141	0.859193	0.0129842	32		Extraction control Sterivex	/	/	/	/
E220002_Aealbo_b	3.95158	0.114359	0.650332	0.0379995	24		E220002_Aealbo_b	7.29951	0.123065	0.882522	0.0171321	32
E220003_Aealbo_a	5.84616	0.125309	0.98848	0.0162994	24		E220003_Aealbo_a	6.72718	0.177117	0.88385	0.0332698	32
E220003_Aealbo_b	5.98161	0.146967	0.976512	0.0225036	24		E220003_Aealbo_b	6.57806	0.0948945	0.865929	0.0231325	32
E220004_Aealbo_a	8.19263	0.0886422	0.959425	0.0175969	24		E220004_Aealbo_a	3.96056	0.135511	0.624001	0.0278183	32		Ae. japonicus
E220004_Aealbo_b	8.99392	0.118823	0.970231	0.0191276	24		E220004_Aealbo_b	4.40522	0.174114	0.658342	0.0607047	32		Sample	ØCt	SD	ØCt	SD	Success rate
E220005_Aealbo_a	4.52074	0.126396	0.838328	0.0453101	24		E220005_Aealbo_a	3.26214	0.122861	0.399929	0.0441425				Value	Value	Quality	Quality	positive
E220005_Aealbo_b	4.45979	0.137832	0.818376	0.0481531	24		E220005_Aealbo_b	3.33742	0.122067	0.418251	0.0418575			Field blank Sterivex	/	/	/	/
E220006_Aealbo_a	13.3824	0.124568	0.983918	0.0138514	24		E220006_Aealbo_a	10.6446	0.182198	0.878926	0.0253217	32		Field blank Sterivex	/	/	/	/
E220006_Aealbo_b	11.7551	0.118979	0.976163	0.0219737	24		E220006_Aealbo_b	9.88605	0.178405	0.891342	0.0174856	32		Extraction control Sterivex	/	/	/	/
E220007_Aealbo_a	2.54095	0.138728	0.178436	0.0453971			E220007_Aealbo_a	3.52567	0.278686	0.15873	0.0273186			Extraction control Sterivex	/	/	/	/
E220007_Aealbo_b	2.5205	0.100423	0.172179	0.0335173			E220007_Aealbo_b	3.48648	0.268455	0.15526	0.0281952			Field blank Nylon	/	/	/	/
E220008_Aealbo_a	12.5193	0.11432	0.987911	0.0171932	24		E220008_Aealbo_a	10.3763	0.163818	0.884544	0.0226983	32		Field blank Nylon	/	/	/	/
E220008_Aealbo_b	10.1293	0.12909	0.975667	0.0173221	24		E220008_Aealbo_b	11.0984	0.131873	0.875322	0.0219341	32		Extraction control Nylon	/	/	/	/
E220009_Aealbo_a	3.53235	0.0810034	0.510784	0.0270011	15		E220009_Aealbo_a	2.96263	0.288929	0.284729	0.0755107			Extraction control Nylon	/	/	/	/
E220009_Aealbo_b	3.63687	0.0744788	0.545625	0.0248263	24		E220009_Aealbo_b	2.76608	0.31565	0.234774	0.0842175			Field blank PES	/	/	/	/
E220010_Aealbo_a	/	/	/	/			E220010_Aealbo_a	4.33081	0.218451	0.579319	0.0666379	32		Field blank PES	/	/	/	/
E220010_Aealbo_b	3.75579	0.0724782	0.585263	0.0241594	24		E220010_Aealbo_b	2.88631	0.338871	0.280151	0.100518			Extraction control PES	/	/	/	/
WI_Süd_PES_A1	/	/	/	/			WI_Süd_PES_A1	/	/	/	/			Extraction control PES	/	/	/	/
WI_Süd_PES_A2	/	/	/	/			WI_Süd_PES_A2	/	/	/	/
WI_Süd_PES_B1	/	/	/	/			WI_Süd_PES_B1	/	/	/	/
WI_Süd_PES_B2	/	/	/	/			WI_Süd_PES_B2	/	/	/	/
WI_Süd_Nylon_A1	/	/	/	/			WI_Süd_Nylon_A1	/	/	/	/			Ae. koreicus
WI_Süd_Nylon_A2	/	/	/	/			WI_Süd_Nylon_A2	/	/	/	/			Sample	ØCt	SD	ØCt	SD	Success rate
WI_Süd_Nylon_B1	/	/	/	/			WI_Süd_Nylon_B1	/	/	/	/				Value	Value	Quality	Quality	positive
WI_Süd_Nylon_B2	/	/	/	/			WI_Süd_Nylon_B2	/	/	/	/			Field blank Sterivex	/	/	/	/
WI_Süd_Steri_A1	/	/	/	/			WI_Süd_Steri_A1	/	/	/	/			Field blank Sterivex	/	/	/	/
WI_Süd_Steri_A2	/	/	/	/			WI_Süd_Steri_A2	/	/	/	/			Extraction control Sterivex	/	/	/	/
WI_Süd_Steri_B1	/	/	/	/			WI_Süd_Steri_B1	/	/	/	/			Extraction control Sterivex	/	/	/	/
WI_Süd_Steri_B2	/	/	/	/			WI_Süd_Steri_B2	/	/	/	/			Field blank Nylon	/	/	/	/
Gins_PES_A1	/	/	/	/			Gins_PES_A1	/	/	/	/			Field blank Nylon	/	/	/	/
Gins_PES_A2	/	/	/	/			Gins_PES_A2	/	/	/	/			Extraction control Nylon	/	/	/	/
Gins_PES_B1	/	/	/	/			Gins_PES_B1	/	/	/	/			Extraction control Nylon	/	/	/	/
Gins_PES_B2	/	/	/	/			Gins_PES_B2	/	/	/	/			Field blank PES	/	/	/	/
Gins_Nylon_A1	/	/	/	/			Gins_Nylon_A1	/	/	/	/			Field blank PES	/	/	/	/
Gins_Nylon_A2	/	/	/	/			Gins_Nylon_A2	/	/	/	/			Extraction control PES	/	/	/	/
Gins_Nylon_B1	/	/	/	/			Gins_Nylon_B1	/	/	/	/			Extraction control PES	/	/	/	/
Gins_Nylon_B2	/	/	/	/			Gins_Nylon_B2	/	/	/	/
Gins_Steri_A1	/	/	/	/			Gins_Steri_A1	/	/	/	/
Gins_Steri_A2	/	/	/	/			Gins_Steri_A2	/	/	/	/
Gins_Steri_B1	/	/	/	/			Gins_Steri_B1	/	/	/	/
Gins_Steri_B2	/	/	/	/			Gins_Steri_B2	/	/	/	/
WI_Ig_PES_A1	/	/	/	/			WI_Ig_PES_A1	/	/	/	/
WI_Ig_PES_A2	/	/	/	/			WI_Ig_PES_A2	/	/	/	/
WI_Ig_PES_B1	/	/	/	/			WI_Ig_PES_B1	/	/	/	/
WI_Ig_PES_B2	/	/	/	/			WI_Ig_PES_B2	/	/	/	/
WI_Ig_Nylon_A1	/	/	/	/			WI_Ig_Nylon_A1	/	/	/	/
WI_Ig_Nylon_A2	/	/	/	/			WI_Ig_Nylon_A2	/	/	/	/
WI_Ig_Nylon_B1	/	/	/	/			WI_Ig_Nylon_B1	/	/	/	/
WI_Ig_Nylon_B2	/	/	/	/			WI_Ig_Nylon_B2	/	/	/	/
WI_Ig_Steri_A1	/	/	/	/			WI_Ig_Steri_A1	/	/	/	/
WI_Ig_Steri_A2	/	/	/	/			WI_Ig_Steri_A2	/	/	/	/
WI_Ig_Steri_B1	/	/	/	/			WI_Ig_Steri_B1	/	/	/	/
WI_Ig_Steri_B2	/	/	/	/			WI_Ig_Steri_B2	/	/	/	/
WI_Nau_PES_A1	/	/	/	/			WI_Nau_PES_A1	/	/	/	/
WI_Nau_PES_A2	/	/	/	/			WI_Nau_PES_A2	/	/	/	/
WI_Nau_PES_B1	/	/	/	/			WI_Nau_PES_B1	/	/	/	/
WI_Nau_PES_B2	/	/	/	/			WI_Nau_PES_B2	/	/	/	/
WI_Nau_Nylon_A1	/	/	/	/			WI_Nau_Nylon_A1	/	/	/	/
WI_Nau_Nylon_A2	/	/	/	/			WI_Nau_Nylon_A2	/	/	/	/
WI_Nau_Nylon_B1	/	/	/	/			WI_Nau_Nylon_B1	/	/	/	/
WI_Nau_Nylon_B2	/	/	/	/			WI_Nau_Nylon_B2	/	/	/	/
WI_Nau_Steri_A1	/	/	/	/			WI_Nau_Steri_A1	/	/	/	/
WI_Nau_Steri_A2	/	/	/	/			WI_Nau_Steri_A2	/	/	/	/
WI_Nau_Steri_B1	/	/	/	/			WI_Nau_Steri_B1	/	/	/	/
WI_Nau_Steri_B2	/	/	/	/			WI_Nau_Steri_B2	/	/	/	/
Ae. japonicus							Ae. japonicus
Sample	ØCt	SD	ØCt	SD	Success rate		Sample	ØCt	SD	ØCt	SD	Success rate
	Value	Value	Quality	Quality	positive			Value	Value	Quality	Quality	positive
Aejapo_0.01g	/	/	/	/			Aejapo_0.01g	3.87937	0.109114	0.471604	0.0770062	32
E220001_Aealbo_a	/	/	/	/			E220001_Aealbo_a	/	/	/	/
E220001_Aealbo_b	/	/	/	/			E220001_Aealbo_b	/	/	/	/
E220002_Aealbo_a	/	/	/	/			E220002_Aealbo_a	/	/	/	/
E220002_Aealbo_b	/	/	/	/			E220002_Aealbo_b	/	/	/	/
E220003_Aealbo_a	/	/	/	/			E220003_Aealbo_a	/	/	/	/
E220003_Aealbo_b	/	/	/	/			E220003_Aealbo_b	/	/	/	/
E220004_Aealbo_a	/	/	/	/			E220004_Aealbo_a	/	/	/	/
E220004_Aealbo_b	/	/	/	/			E220004_Aealbo_b	/	/	/	/
E220005_Aealbo_a	/	/	/	/			E220005_Aealbo_a	/	/	/	/
E220005_Aealbo_b	/	/	/	/			E220005_Aealbo_b	/	/	/	/
E220006_Aealbo_a	/	/	/	/			E220006_Aealbo_a	/	/	/	/
E220006_Aealbo_b	/	/	/	/			E220006_Aealbo_b	/	/	/	/
E220007_Aealbo_a	/	/	/	/			E220007_Aealbo_a	/	/	/	/
E220007_Aealbo_b	/	/	/	/			E220007_Aealbo_b	/	/	/	/
E220008_Aealbo_a	/	/	/	/			E220008_Aealbo_a	/	/	/	/
E220008_Aealbo_b	/	/	/	/			E220008_Aealbo_b	/	/	/	/
E220009_Aealbo_a	/	/	/	/			E220009_Aealbo_a	/	/	/	/
E220009_Aealbo_b	/	/	/	/			E220009_Aealbo_b	/	/	/	/
E220010_Aealbo_a	/	/	/	/			E220010_Aealbo_a	/	/	/	/
E220010_Aealbo_b	/	/	/	/			E220010_Aealbo_b	/	/	/	/
WI_Süd_PES_A1	/	/	/	/			WI_Süd_PES_A1	/	/	/	/
WI_Süd_PES_A2	/	/	/	/			WI_Süd_PES_A2	/	/	/	/
WI_Süd_PES_B1	/	/	/	/			WI_Süd_PES_B1	/	/	/	/
WI_Süd_PES_B2	/	/	/	/			WI_Süd_PES_B2	/	/	/	/
WI_Süd_Nylon_A1	/	/	/	/			WI_Süd_Nylon_A1	/	/	/	/
WI_Süd_Nylon_A2	/	/	/	/			WI_Süd_Nylon_A2	/	/	/	/
WI_Süd_Nylon_B1	/	/	/	/			WI_Süd_Nylon_B1	/	/	/	/
WI_Süd_Nylon_B2	/	/	/	/			WI_Süd_Nylon_B2	/	/	/	/
WI_Süd_Steri_A1	/	/	/	/			WI_Süd_Steri_A1	/	/	/	/
WI_Süd_Steri_A2	/	/	/	/			WI_Süd_Steri_A2	/	/	/	/
WI_Süd_Steri_B1	/	/	/	/			WI_Süd_Steri_B1	/	/	/	/
WI_Süd_Steri_B2	/	/	/	/			WI_Süd_Steri_B2	/	/	/	/
Gins_PES_A1	/	/	/	/			Gins_PES_A1	/	/	/	/
Gins_PES_A2	/	/	/	/			Gins_PES_A2	/	/	/	/
Gins_PES_B1	/	/	/	/			Gins_PES_B1	/	/	/	/
Gins_PES_B2	/	/	/	/			Gins_PES_B2	/	/	/	/
Gins_Nylon_A1	/	/	/	/			Gins_Nylon_A1	/	/	/	/
Gins_Nylon_A2	/	/	/	/			Gins_Nylon_A2	/	/	/	/
Gins_Nylon_B1	/	/	/	/			Gins_Nylon_B1	/	/	/	/
Gins_Nylon_B2	/	/	/	/			Gins_Nylon_B2	/	/	/	/
Gins_Steri_A1	/	/	/	/			Gins_Steri_A1	/	/	/	/
Gins_Steri_A2	/	/	/	/			Gins_Steri_A2	/	/	/	/
Gins_Steri_B1	/	/	/	/			Gins_Steri_B1	/	/	/	/
Gins_Steri_B2	/	/	/	/			Gins_Steri_B2	/	/	/	/
WI_Ig_PES_A1	11.3279	0.651569	0.667427	0.0690193	23		WI_Ig_PES_A1	12.8364	0.756325	0.491405	0.0966231	32
WI_Ig_PES_A2	11.9343	0.440812	0.775994	0.0724243	23		WI_Ig_PES_A2	11.8535	0.307012	0.59577	0.092507	32
WI_Ig_PES_B1	10.8751	0.360137	0.765553	0.0512974	18		WI_Ig_PES_B1	10.2771	0.235047	0.536435	0.057287	32
WI_Ig_PES_B2	12.064	0.249653	0.734974	0.0504326	23		WI_Ig_PES_B2	11.5531	0.173475	0.689608	0.0223667	32
WI_Ig_Nylon_A1	15.3109	0.258532	0.801487	0.0455982	22		WI_Ig_Nylon_A1	/	/	/	/
WI_Ig_Nylon_A2	15.1684	0.358969	0.821243	0.0740907	22		WI_Ig_Nylon_A2	11.8172	0.23873	0.623906	0.0219956	32
WI_Ig_Nylon_B1	11.4487	0.380103	0.703758	0.053816	22		WI_Ig_Nylon_B1	8.82128	0.207129	0.639772	0.0583807	32
WI_Ig_Nylon_B2	11.4281	0.387693	0.725154	0.0674974	21		WI_Ig_Nylon_B2	10.9035	0.187652	0.625499	0.04646	32
WI_Ig_Steri_A1	12.0018	0.536592	0.681827	0.0690896	7		WI_Ig_Steri_A1	10.0214	0.269368	0.523921	0.0707705	32
WI_Ig_Steri_A2	11.0479	0.247448	0.708002	0.0315849	12		WI_Ig_Steri_A2	10.0925	0.191041	0.573396	0.0652733	32
WI_Ig_Steri_B1	10.461	0.355379	0.736698	0.0500803	21		WI_Ig_Steri_B1	8.166	0.190505	0.557323	0.0781305	32
WI_Ig_Steri_B2	10.8279	0.657383	0.609288	0.110691	21		WI_Ig_Steri_B2	16.1604	1.23585	0.337584	0.0394989	32
WI_Nau_PES_A1	/	/	/	/			WI_Nau_PES_A1	/	/	/	/
WI_Nau_PES_A2	/	/	/	/			WI_Nau_PES_A2	/	/	/	/
WI_Nau_PES_B1	/	/	/	/			WI_Nau_PES_B1	/	/	/	/
WI_Nau_PES_B2	/	/	/	/			WI_Nau_PES_B2	/	/	/	/
WI_Nau_Nylon_A1	14.9581	0.540028	0.599391	0.030317	22		WI_Nau_Nylon_A1	/	/	/	/
WI_Nau_Nylon_A2	15.6444	0.393968	0.760031	0.0509087	22		WI_Nau_Nylon_A2	/	/	/	/
WI_Nau_Nylon_B1	/	/	/	/			WI_Nau_Nylon_B1	/	/	/	/
WI_Nau_Nylon_B2	/	/	/	/			WI_Nau_Nylon_B2	/	/	/	/
WI_Nau_Steri_A1	/	/	/	/			WI_Nau_Steri_A1	/	/	/	/
WI_Nau_Steri_A2	/	/	/	/			WI_Nau_Steri_A2	22.243	1.33074	0.275751	0.0521269	32
WI_Nau_Steri_B1	/	/	/	/			WI_Nau_Steri_B1	/	/	/	/
WI_Nau_Steri_B2	/	/	/	/			WI_Nau_Steri_B2	/	/	/	/
FALSE POSITIVES							FALSE POSITIVES
E220001_Aealbo_a	13.0611	0.596728	0.66589	0.041461	24		E220001_Aealbo_b	12.0295	0.210094	0.649908	0.0602704	32
E220001_Aealbo_b	13.1451	0.593101	0.687112	0.0358629	22		E220001_Aealbo_a	11.1348	0.212121	0.612593	0.0510915	32
E220003_Aealbo_a	15.9304	0.391028	0.750686	0.0860134	23		E220003_Aealbo_b	14.8014	0.350711	0.556465	0.0634917	32
E220007_Aealbo_b	13.9195	0.625932	0.721503	0.0638701	21		E220004_Aealbo_a	20.5044	0.356641	0.337974	0.0609468	32
							E220007_Aealbo_a	12.8235	0.268373	0.630753	0.0486521	32
							E220007_Aealbo_b	12.5385	0.291835	0.551647	0.025695	32
Ae. koreicus							Ae. koreicus
Sample	ØCt	SD	ØCt	SD	Success rate		Sample	ØCt	SD	ØCt	SD	Success rate
	Value	Value	Quality	Quality	positive			Value	Value	Quality	Quality	positive
Aekore_0.01g	10.8867	0.314788	0.644128	0.0739469	24		Aekore_0.01g	/	/	/	/
E220001_Aealbo_a	/	/	/	/			E220001_Aealbo_a	/	/	/	/
E220001_Aealbo_b	/	/	/	/			E220001_Aealbo_b	/	/	/	/
E220002_Aealbo_a	/	/	/	/			E220002_Aealbo_a	/	/	/	/
E220002_Aealbo_b	/	/	/	/			E220002_Aealbo_b	/	/	/	/
E220003_Aealbo_a	/	/	/	/			E220003_Aealbo_a	/	/	/	/
E220003_Aealbo_b	/	/	/	/			E220003_Aealbo_b	/	/	/	/
E220004_Aealbo_a	/	/	/	/			E220004_Aealbo_a	/	/	/	/
E220004_Aealbo_b	/	/	/	/			E220004_Aealbo_b	/	/	/	/
E220005_Aealbo_a	/	/	/	/			E220005_Aealbo_a	/	/	/	/
E220005_Aealbo_b	/	/	/	/			E220005_Aealbo_b	/	/	/	/
E220006_Aealbo_a	/	/	/	/			E220006_Aealbo_a	/	/	/	/
E220006_Aealbo_b	/	/	/	/			E220006_Aealbo_b	/	/	/	/
E220007_Aealbo_a	/	/	/	/			E220007_Aealbo_a	/	/	/	/
E220007_Aealbo_b	/	/	/	/			E220007_Aealbo_b	/	/	/	/
E220008_Aealbo_a	/	/	/	/			E220008_Aealbo_a	/	/	/	/
E220008_Aealbo_b	/	/	/	/			E220008_Aealbo_b	/	/	/	/
E220009_Aealbo_a	/	/	/	/			E220009_Aealbo_a	/	/	/	/
E220009_Aealbo_b	/	/	/	/			E220009_Aealbo_b	/	/	/	/
E220010_Aealbo_a	/	/	/	/			E220010_Aealbo_a	/	/	/	/
E220010_Aealbo_b	/	/	/	/			E220010_Aealbo_b	/	/	/	/
WI_Süd_PES_A1	10.9698	0.347388	0.64566	0.0917201	24		WI_Süd_PES_A1	8.40012	1.15063	0.633991	0.12248	30
WI_Süd_PES_A2	11.3287	0.356294	0.573435	0.0733084	24		WI_Süd_PES_A2	8.2689	0.257	0.707379	0.0354032	31
WI_Süd_PES_B1	11.0157	0.400526	0.640563	0.0781927	24		WI_Süd_PES_B1	6.21042	0.178749	0.595121	0.0294044	31
WI_Süd_PES_B2	10.1721	0.449091	0.648651	0.106564	24		WI_Süd_PES_B2	9.32457	0.34496	0.538282	0.0296052	31
WI_Süd_Nylon_A1	12.8079	0.392364	0.705227	0.0620083	24		WI_Süd_Nylon_A1	7.28072	0.410762	0.533346	0.0486737	31
WI_Süd_Nylon_A2	10.5351	0.462737	0.660796	0.0439584	24		WI_Süd_Nylon_A2	8.94323	0.324711	0.46476	0.0358521	31
WI_Süd_Nylon_B1	11.8266	0.46561	0.68955	0.0363458	24		WI_Süd_Nylon_B1	7.12047	0.432619	0.55428	0.0708	31
WI_Süd_Nylon_B2	12.3007	0.488818	0.706807	0.0505005	24		WI_Süd_Nylon_B2	8.17559	0.215826	0.566965	0.0404193	31
WI_Süd_Steri_A1	9.98224	0.676023	0.655603	0.0707099	24		WI_Süd_Steri_A1	8.13024	0.282783	0.578086	0.0527401	31
WI_Süd_Steri_A2	11.1937	0.91064	0.620883	0.0448318	24		WI_Süd_Steri_A2	7.56859	0.218102	0.600499	0.0332996	31
WI_Süd_Steri_B1	9.27153	0.46099	0.672324	0.0583397	24		WI_Süd_Steri_B1	7.9164	0.227017	0.607181	0.0407183	31
WI_Süd_Steri_B2	10.0929	0.53548	0.618451	0.0584779	24		WI_Süd_Steri_B2	8.24828	0.251237	0.637927	0.0390811	31
Gins_PES_A1	/	/	/	/			Gins_PES_A1	/	/	/	/
Gins_PES_A2	/	/	/	/			Gins_PES_A2	/	/	/	/
Gins_PES_B1	/	/	/	/			Gins_PES_B1	/	/	/	/
Gins_PES_B2	/	/	/	/			Gins_PES_B2	/	/	/	/
Gins_Nylon_A1	/	/	/	/			Gins_Nylon_A1	/	/	/	/
Gins_Nylon_A2	/	/	/	/			Gins_Nylon_A2	/	/	/	/
Gins_Nylon_B1	/	/	/	/			Gins_Nylon_B1	/	/	/	/
Gins_Nylon_B2	/	/	/	/			Gins_Nylon_B2	/	/	/	/
Gins_Steri_A1	/	/	/	/			Gins_Steri_A1	/	/	/	/
Gins_Steri_A2	/	/	/	/			Gins_Steri_A2	/	/	/	/
Gins_Steri_B1	/	/	/	/			Gins_Steri_B1	/	/	/	/
Gins_Steri_B2	/	/	/	/			Gins_Steri_B2	/	/	/	/
WI_Ig_PES_A1	13.3251	0.601004	0.591546	0.0905849	24		WI_Ig_PES_A1	12.1391	0.265078	0.39199	0.131946	31
WI_Ig_PES_A2	11.5446	0.495327	0.751734	0.0658359	24		WI_Ig_PES_A2	10.5449	0.45028	0.573087	0.0371577	31
WI_Ig_PES_B1	9.88462	0.335438	0.726126	0.0713753	24		WI_Ig_PES_B1	11.2858	0.548177	0.493598	0.0704036	31
WI_Ig_PES_B2	12.7889	0.365937	0.646494	0.079812	24		WI_Ig_PES_B2	10.0946	0.126999	0.605706	0.0965318	31
WI_Ig_Nylon_A1	15.2196	0.353431	0.735003	0.0874503	24		WI_Ig_Nylon_A1	8.8012	0.467369	0.552953	0.0534117	31
WI_Ig_Nylon_A2	13.2011	0.462483	0.749928	0.0744131	24		WI_Ig_Nylon_A2	11.9068	0.284293	0.599098	0.0537406	31
WI_Ig_Nylon_B1	10.696	0.49607	0.637673	0.085638	24		WI_Ig_Nylon_B1	9.23454	0.409838	0.52075	0.0689606	31
WI_Ig_Nylon_B2	12.6916	0.551668	0.649358	0.104139	24		WI_Ig_Nylon_B2	10.7267	0.405711	0.584044	0.0342802	31
WI_Ig_Steri_A1	11.2741	0.46291	0.612482	0.0478121	24		WI_Ig_Steri_A1	10.2966	0.613939	0.484391	0.0708938	31
WI_Ig_Steri_A2	11.3777	0.304365	0.646661	0.0372078	24		WI_Ig_Steri_A2	9.04803	0.477987	0.593326	0.0624268	31
WI_Ig_Steri_B1	10.7534	0.384084	0.660197	0.0721284	24		WI_Ig_Steri_B1	8.13076	0.486548	0.583986	0.0748051	31
WI_Ig_Steri_B2	11.5192	0.524694	0.573673	0.0688724	24		WI_Ig_Steri_B2	15.4055	1.36647	0.22236	0.0597378	31
WI_Nau_PES_A1	/	/	/	/			WI_Nau_PES_A1	/	/	/	/
WI_Nau_PES_A2	13.8895	0.509664	0.729224	0.0668344	24		WI_Nau_PES_A2	/	/	/	/
WI_Nau_PES_B1	/	/	/	/			WI_Nau_PES_B1	/	/	/	/
WI_Nau_PES_B2	14.9406	0.499732	0.698979	0.0845566	24		WI_Nau_PES_B2	/	/	/	/
WI_Nau_Nylon_A1	/	/	/	/			WI_Nau_Nylon_A1	/	/	/	/
WI_Nau_Nylon_A2	/	/	/	/			WI_Nau_Nylon_A2	/	/	/	/
WI_Nau_Nylon_B1	/	/	/	/			WI_Nau_Nylon_B1	/	/	/	/
WI_Nau_Nylon_B2	/	/	/	/			WI_Nau_Nylon_B2	/	/	/	/
WI_Nau_Steri_A1	14.1891	0.434477	0.666166	0.0909818	24		WI_Nau_Steri_A1	/	/	/	/
WI_Nau_Steri_A2	/	/	/	/			WI_Nau_Steri_A2	/	/	/	/
WI_Nau_Steri_B1	/	/	/	/			WI_Nau_Steri_B1	12.2263	0.571969	0.528224	0.0796487	31
WI_Nau_Steri_B2	/	/	/	/			WI_Nau_Steri_B2	/	/	/	/
FALSE POSITIVES							FALSE POSITIVES
E220001_Aealbo_b	14.887	0.490711	0.75431	0.0637913	24		Aealbo0.01ng	3.47585	0.312167	0.303573	0.0677914	31

## Sheet: Standard curves
Species	Concentration	R1	R2	R3	R4	R5	R6	R7	R8	R9	R10	ØCt	SD
	[pg/µl]
Ae. albopictus	10000	17.545	17.244	17.164	17.225	17.096	17.245	17.1	17.187	17.075	17.261	17.214	0.134669
	1000	20.586	20.523	20.452	20.597	20.502	20.541	20.434	20.512	20.506	20.525	20.518	0.0508982
	100	24.013	23.747	23.871	23.873	23.934	23.878	23.837	23.942	23.991	23.991	23.908	0.082388
	10	27.309	27.304	27.41	27.207	27.442	27.486	27.401	27.339	27.221	27.272	27.339	0.0937283
	1	32.008	31.563	31.599	31.703	31.844	31.875	31.606	31.706	31.98	31.786	31.767	0.158108
	0.1	36.613	36.515	36.99	38.423	36.023	35.424	37.002	35.699	36.345	35.041	36.408	0.960155
	0.01	37.478	37.466	/	/	/	/	/	/	/	/	37.472	0.00848528
Ae. japonicus	10000	22.253	21.767	21.681	22.727	22.726	22.676	21.966	21.766	/	/	22.2	0.460368
	1000	24.344	23.964	24.315	24.638	25.828	24.769	25.006	24.361	26.948	/	24.91	0.933402
	100	27.495	27.651	27.423	27.979	27.733	28.102	28.468	27.807	27.681	/	27.82	0.324688
	10	31.088	31.181	30.938	31.807	31.366	31.46	31.656	31.055	30.917	/	31.27	0.31714
	1	34.786	34.917	34.477	36.42	34.889	34.327	35.075	34.812	/	/	34.96	0.636711
	0.1	37.977	39.474	/	40.265	38.368	38.673	/	/	/	/	38.95	0.917329
Ae. koreicus	10000	20.899	19.089	18.708	17.567	18.993	18.996	18.949	18.514	18.529	18.668	18.89	0.830357
	1000	23.096	21.844	21.763	21.855	22.131	22.313	22.305	21.887	22.044	21.924	22.12	0.393892
	100	25.98	25.294	25.335	24.469	25.177	24.532	25.053	25.208	25.062	25.33	25.14	0.427243
	10	30.099	28.409	28.17	28.274	28.531	28.256	28.097	28.478	27.993	28.668	28.5	0.599413
	1	33.541	32.267	31.925	32.312	32.267	32.206	32.301	31.473	31.949	31.803	32.2	0.543099
	0.1	36.818	36.883	35.55	38.037	36.927	/	35.948	36.958	/	35.546	36.58	0.850545
